# Supplementary material for: Insulin Resistance Is Not Sustained Following Denervation in Glycolytic Skeletal Muscle
Source: MDPI journal article supplement (doi:10.3390/ijms22094913), 2021-05-06
Supplement: s1 [file s1]

# McMillin SL et al, *IJMS* – Supplemental Figure 1

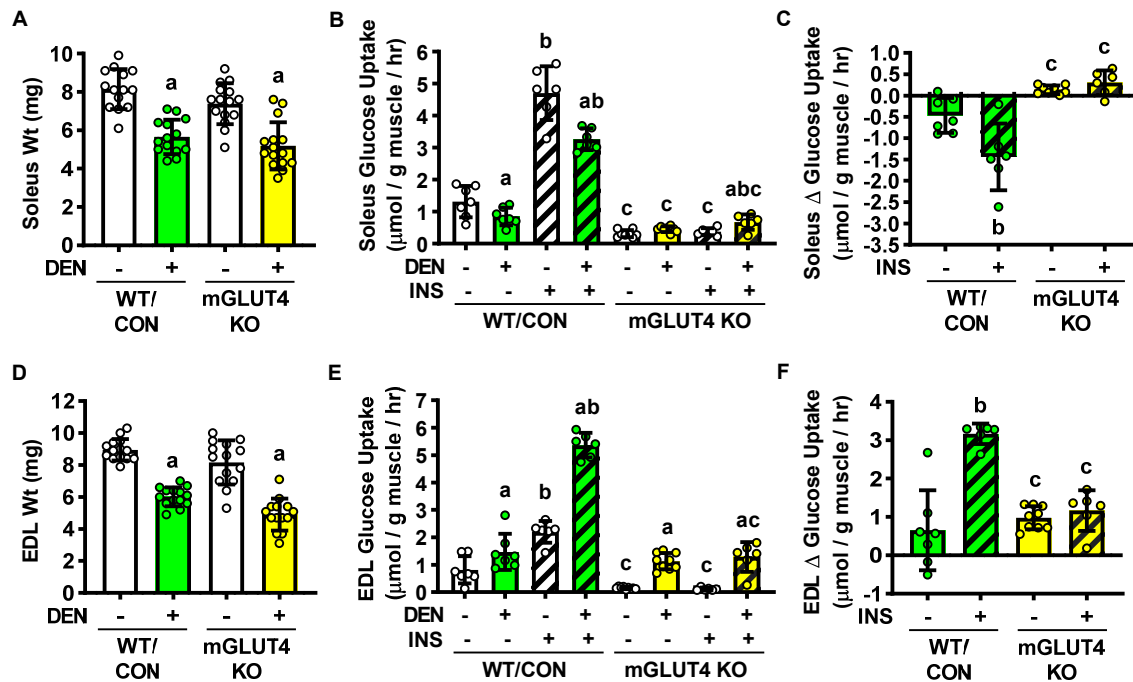

**Supplemental Figure S1. Loss of GLUT4 expression differentially alters the effects of long-term denervation on skeletal muscle glucose uptake.** In female wild-type/control (WT/CON) and muscle-specific GLUT4 knockout (mGLUT4 KO) mice hindlimb muscle denervation (DEN+) was induced in one leg for 28 days while the contralateral leg was sham-operated (DEN-). (A) Soleus muscle weights. (B) Soleus muscle ex vivo [ $^3\text{H}$ ]-2-deoxy-D-glucose uptake in the absence of insulin (INS-) or in the presence of 50 mU/ml insulin (INS+). (C) DEN-induced change in soleus muscle glucose uptake rates relative to the contralateral control muscle. (D) Extensor digitorum longus (EDL) muscle weights. (E) EDL muscle ex vivo [ $^3\text{H}$ ]-2-deoxy-D-glucose uptake with INS- or INS+. (F) DEN-induced change in EDL muscle glucose uptake rates relative to the contralateral control muscle. Statistical significance was defined as  $P < 0.05$ , determined using Three-Way ANOVAs and/or Two-Way ANOVAs and Tukey's post-hoc analysis, and denoted by 'a' vs Sham, 'b' vs INS-, and 'c' vs WT/CON. (Panels A & D: N=12-15 muscles/group; Panels B, C, E & F: N=6-9 muscles/group)
